**Title:** G protein-coupled estrogen receptor regulates heart rate and heart valve thickness in zebrafish

**Authors:** Shannon N Romano<sup>1</sup>, Hailey E Edwards<sup>1</sup>, J Paige Souder<sup>1</sup>, Xiangqin Cui<sup>2</sup>, Daniel A Gorelick<sup>1\*</sup>

**Affiliations:** <sup>1</sup>Department of Pharmacology & Toxicology, <sup>2</sup>Department of Biostatistics, University of Alabama at Birmingham.

\*Correspondence to: [danielg@uab.edu](mailto:danielg@uab.edu)

**Abstract:** Estrogens act by binding to estrogen receptors alpha and beta (ER $\alpha$ , ER $\beta$ ), ligand-dependent transcription factors that play crucial roles in sex differentiation, tumor growth and cardiovascular physiology. Estrogens also activate the G protein-coupled estrogen receptor (GPER), however the function of GPER *in vivo* is less well understood. Here we find that GPER is required for normal heart rate in zebrafish embryos and for normal valve thickness in zebrafish adults. Acute exposure to estrogens increased heart rate in wildtype and in ER $\alpha$  and ER $\beta$  mutant embryos but not in GPER mutants. Nuclear estrogen receptor signaling remained normal in GPER mutant embryos. However, GPER mutant embryos exhibited reduced basal heart rate while heart rate was normal in ER $\alpha$  and ER $\beta$  mutants. We detected *gper* transcript in discrete regions of the brain but not in the heart. In the brain, we observed *gper* expression in cells lacking nuclear estrogen receptor activity, suggesting that GPER acts in the brain to regulate heart rate independently of nuclear estrogen receptor signaling. Additionally, blood flow in embryos has been shown to influence heart valve maturation, suggesting the hypothesis that reduced heart rate during embryonic and juvenile development disrupts heart valve maturation. Consistent with this hypothesis, we find that adult GPER mutants have thinner heart valves than wildtype. Our results demonstrate that estradiol plays a previously unappreciated role in the acute modulation of heart rate during zebrafish embryonic development and that GPER functions as an autonomous estrogen receptor *in vivo* to regulate basal heart rate and heart valve thickness.

## Main Text:

### INTRODUCTION

Zebrafish are an established model for human cardiovascular development and function (1) with conserved estrogen signaling (2-4). While studying the function of ER $\alpha$  (*esr1*) in zebrafish embryonic heart valves (5, 6), we serendipitously observed that estrogen receptor modulators caused acute changes in heart rate. Estrogens bind two classes of receptors: nuclear hormone receptors (ER $\alpha$ , ER $\beta$ ) that are ligand-dependent transcription factors (7), and the G protein-coupled estrogen receptor (GPER, also known as GPR30), an integral membrane protein (8, 9). It has been difficult to tease apart to what degree ER $\alpha$  and/or ER $\beta$  are involved in regulating GPER function *in vivo*. The observations that ER $\alpha$  can directly activate G proteins in cultured cells (10-13) and that GPER coimmunoprecipitated with ER $\alpha$  in tumor cells (14) has been used to argue that either GPER is dispensable for estrogen-dependent signaling or that GPER mediates interactions between ER $\alpha$  and G proteins (15). Studies using GPER-deficient mice implicate GPER in ventricular hypertrophy (16), regulation of blood pressure and vascular tone (17, 18) and atherosclerosis progression (19), but whether nuclear ER signaling is required for GPER function in these contexts is unknown. Additionally, these studies examined GPER function in adult animals, while the role of GPER during embryonic development is not well understood. Here we use zebrafish embryos, an established model of human development, to reveal a new function for GPER during cardiovascular development.

Estrogen signaling often differs between males and females. However, zebrafish embryos and larvae are bipotential hermaphrodites that have not begun to sexually differentiate before approximately 10 days post fertilization (dpf) (20), meaning that estrogen levels are uniform between age-matched embryos. Additionally, zebrafish embryos develop outside of the mother and not within a confined space, such as the uterus. Therefore, zebrafish embryos are not subject

to local estrogen concentration gradients, as has been reported to occur in rodents depending upon their position *in utero* and their proximity to embryos of the same or opposite sex (21, 22). These developmental traits make zebrafish a powerful model to study how sex hormone signaling influences the formation and function of non-gonadal tissues. Using complementary genetic and pharmacologic approaches, we sought to characterize how estradiol regulates heart rate and determine to what extent each estrogen receptor mediates estradiol-dependent changes in heart rate in zebrafish embryos.

## RESULTS

We exposed 49 hour post fertilization (hpf) embryos to 17 $\beta$ -estradiol (estradiol) and assayed heart rate following one hour exposure. We found that estradiol exposure caused an approximately 20% increase in heart rate (Fig. 1, mean difference in heart rate between estradiol and vehicle exposed embryos was  $26.51 \pm 3.36$  (standard error) beats per minute (bpm)). Exposure to progesterone, a structurally similar steroid sex hormone, had no effect on heart rate (Fig. 1, mean difference in heart rate  $2.31 \pm 6.54$ ), suggesting that the effects on heart rate were specific to estrogens.

To explore whether heart rate was influenced by nuclear estrogen receptor or GPER signaling pathways, we employed a pharmacological approach. We exposed embryos to ICI182,780 (fulvestrant), a well-characterized ER $\alpha$  and ER $\beta$  antagonist (23) that also acts as a GPER agonist (8). Following one-hour exposure to ICI182,780, heart rate was significantly increased (Fig. 1, mean difference in heart rate  $29.81 \pm 4.75$  bpm). This effect was blocked by co-administration of G36, a specific GPER antagonist (24) (Fig. 1, mean difference in heart rate  $4.10 \pm 6.23$  bpm), suggesting that estradiol increases heart rate via GPER. We also exposed embryos to G1, a specific GPER agonist with no detectable agonist activity against nuclear estrogen receptors (25), and found that heart rate increased significantly (Fig. 1, mean difference in heart rate  $40.98$

$\pm 6.35$  bpm). Together, our pharmacological results suggest that GPER regulates heart rate acutely.

To definitively test the hypothesis that estradiol regulates heart rate via GPER, we generated GPER mutant embryos, exposed them to estrogen receptor modulators and assayed heart rate. Using CRISPR-Cas technology (26), we generated embryos with a 131 basepair deletion in the *gper* open reading frame (Fig. 2A, B). Embryos were viable and grossly normal, allowing us to measure heart rate (Fig. 2C, D). We exposed homozygous maternal zygotic *gper* mutant embryos (*MZgper*<sup>-/-</sup>) to estradiol or to ICI182,780 and found no increase in heart rate compared to embryos exposed to vehicle (Fig. 2E). Our results demonstrate that estradiol increases heart rate in a GPER-dependent manner. Note that zygotic *gper* mutants exhibited increased heart rate in response to estradiol (Fig. S1, mean difference in heart rate  $29.11 \pm 3.56$  bpm), indicating that GPER is maternally deposited into oocytes and expressed in embryos. This is consistent with previously published results that detected *gper* transcript in zebrafish embryos at 1 hour post fertilization, suggesting the presence of maternally loaded *gper* mRNA (27).

To test whether endogenous estrogens regulate heart rate during embryonic development, we examined basal heart rate in GPER mutant embryos reared in untreated water, reasoning that if heart rate was reduced, then that would suggest that endogenous estradiol regulates heart rate via GPER. We compared heart rate in wildtype versus *MZgper*<sup>-/-</sup> embryos at 50 hpf and found that *MZgper*<sup>-/-</sup> embryos had reduced heart rate compared to wildtype (Fig. 2F, mean difference in heart rate between wildtype and mutant  $-30.80 \pm 7.07$  bpm). These results demonstrate that GPER is required for normal basal heart rate in embryos and strongly suggest that endogenous estrogens influence heart rate via GPER.

Whether GPER acts as an autonomous estrogen receptor *in vivo* is controversial. Previous reports suggest that GPER activity might require interaction with nuclear estrogen receptors at the membrane or that estrogens activate GPER indirectly, by binding to nuclear receptors in the cytosol that then



activate downstream proteins, including GPER (15, 28). To determine whether nuclear estrogen receptors influence heart rate, we generated zebrafish with loss-of-function mutations in each nuclear estrogen receptor gene: *esr1* (ER $\alpha$ ), *esr2a* (ER $\beta$ 1) and *esr2b* (ER $\beta$ 2) (Fig. S2-S4). All mutant embryos were viable and grossly normal, allowing us to measure heart rate (Fig. S2-S4). To test whether estradiol increases heart rate via nuclear estrogen receptors, we exposed 49 hpf *esr1*<sup>-/-</sup>, *esr2a*<sup>-/-</sup> and *esr2b*<sup>-/-</sup> embryos to estradiol or vehicle for one hour and assayed heart rate. Following estradiol exposure, heart rate was increased in all mutants compared to vehicle control (Fig. 3A, mean difference in heart rate between estradiol and vehicle 25.04  $\pm$  5.68 bpm for *esr1*<sup>-/-</sup>, 37.23  $\pm$  7.66 bpm for *esr2a*<sup>-/-</sup>, 32.48  $\pm$  1.92 bpm for *esr2b*<sup>-/-</sup>), similar to what we observed when wildtype embryos were exposed to estradiol (Fig. 1). These results demonstrate that nuclear estrogen receptors are not necessary for estradiol-dependent increase in heart rate.

To test whether endogenous estrogens regulate heart rate via nuclear estrogen receptors, we bred heterozygous fish to generate embryos homozygous for mutations in either *esr1*, *esr2a* or *esr2b* genes and assayed heart rate in 50 hpf embryos. We observed no significant difference in basal heart rate between homozygotes, heterozygotes or wild type siblings within the same clutch (Fig. 3B, mean difference in heart rate between homozygote and wildtype -4.34  $\pm$  1.37 for *esr1*, -0.46  $\pm$  3.75 for *esr2a*, -2.37  $\pm$  3.26 for *esr2b*; between heterozygote and wildtype -3.34  $\pm$  1.02 for *esr1*, -0.91  $\pm$  1.53 for *esr2a*, 0.63  $\pm$  1.66 for *esr2b*). These results demonstrate that nuclear estrogen receptors are not required for the establishment of normal basal heart rate in embryos.

It is possible that the mutations generated in each nuclear estrogen receptor gene do not cause loss of functional estrogen receptor proteins. To exclude this possibility and show that *esr* mutants exhibit loss of functional ER proteins, we generated *esr* mutants on the *Tg(5xERE:GFP)*<sup>c262/c262</sup> transgenic background, where green fluorescent protein (GFP) expression occurs in cells with activated nuclear estrogen receptors (5) (referred to as 5xERE:GFP). Previous studies using whole mount *in situ* hybridization demonstrated that *esr1*

is expressed in embryonic heart valves while *esr2b* is expressed in the liver (6), therefore we hypothesized that mutants would fail to upregulate GFP in tissues where the relevant receptor is normally expressed. We exposed 2-3 day post fertilization (dpf) *5xERE:GFP*, *5xERE:GFP;esr1<sup>-/-</sup>*, *5xERE:GFP;esr2a<sup>-/-</sup>* and *5xERE:GFP;esr2b<sup>-/-</sup>* embryos to 100 ng/ml 17 $\beta$ -estradiol overnight and assayed fluorescence. Consistent with *esr* gene expression patterns, *5xERE:GFP;esr1<sup>-/-</sup>* larvae exhibited fluorescence in the liver but not in the heart (Fig. S2), whereas *5xERE:GFP;esr2b<sup>-/-</sup>* larvae exhibited fluorescence in the heart but not in the liver (Fig. S4). *esr2a* transcript was not detected at these embryonic and larval stages (6) and, as expected, we saw no change in fluorescence between *5xERE:GFP* and *5xERE:GFP;esr2a<sup>-/-</sup>* (Fig. S3). We conclude that the zebrafish nuclear estrogen receptor mutants lack estrogen receptor function.

Deleterious mutations can induce genetic compensation (29), however results from the *5xERE:GFP esr* mutants suggest that compensatory expression of *esr* genes is not occurring. For example, it is possible that in the *esr1* mutant there is compensatory upregulation of *esr2a* and/or *esr2b* that masks a heart rate phenotype. If *esr2a* or *esr2b* were upregulated in *esr1* mutants, then we would expect to see fluorescence in the heart in *5xERE:GFP;esr1<sup>-/-</sup>* embryos. Instead, we observed no fluorescence in the hearts of *5xERE:GFP;esr1<sup>-/-</sup>* embryos (Fig. S2). Similarly, we observed no ectopic fluorescence in *5xERE:GFP;esr2b<sup>-/-</sup>* embryos (Fig. S4), suggesting that *esr* genes are not compensating for one another in the multiple zebrafish *esr* mutants.

To further test whether nuclear estrogen receptor signaling is influenced by GPER, we generated *gper* mutants on the *5xERE:GFP* transgenic background and asked whether estradiol exposure reduced nuclear estrogen receptor activity in mutants compared to wildtype. Following overnight exposure to estradiol, 3 dpf *5xERE:GFP* and *5xERE:GFP;MZgper<sup>-/-</sup>* larvae exhibited similar fluorescence (Fig. S5). These results demonstrate that nuclear estrogen receptor transcriptional activity does not require GPER and support the hypothesis that GPER acts as an autonomous estrogen receptor *in vivo*.

Heart rate can be modulated by cardiomyocytes in the heart, or by cells in the central nervous system, which directly innervates the heart to modulate heart rate and also regulates the release of humoral factors, such as thyroid hormone, that bind to receptors in cardiomyocytes and regulate heart rate (30). To determine whether GPER regulates heart rate tissue autonomously, we performed whole mount *in situ* hybridization to test whether *gper* transcripts are expressed in 50 hpf zebrafish embryo hearts. We did not detect transcript in the heart or in the vasculature. In contrast, we detected *gper* mRNA in three discrete anatomic areas of the brain: the preoptic and olfactory areas and in the ventral hypothalamus (Fig. 4A-C). Thus, *gper* localization is consistent with the hypothesis that GPER acts in the brain, and not through cells in the heart, to regulate heart rate.

Genetic evidence using *esr* mutants suggests that GPER acts independently of nuclear estrogen receptors to regulate heart rate (Fig. 3). To further test the hypothesis that GPER acts as an autonomous estrogen receptor *in vivo*, we asked whether GPER and nuclear estrogen receptors are expressed in the same cells in the brain, reasoning that if GPER and nuclear estrogen receptors fail to colocalize, this would support the idea that GPER acts as an autonomous estrogen receptor *in vivo*. We took 5xERE:GFP embryos at 1 day post fertilization and exposed them overnight to 100 ng/ml estradiol. When the embryos reached 48 hpf, we used two color fluorescent *in situ* hybridization to detect *gfp* and *gper* transcripts simultaneously. Since all three nuclear estrogen receptor genes activate the 5xERE:GFP transgene, detecting *gfp* allows us to monitor activity of all three estrogen receptors using a single RNA probe. In the olfactory and preoptic areas, we found no colocalization between *gfp* and *gper* (Fig. 4D, E). In the ventral hypothalamus, we found a cluster of cells at the midline expressing *gper* but not *gfp*. Surrounding this region of *gper*-positive cells was a bilaterally symmetric 'U'-shaped labeling pattern of cells expressing both *gper* and *gfp* (Fig. 4F). Thus, GPER and nuclear estrogen receptors are expressed in unique and overlapping cells in the brain, supporting the hypothesis that GPER can act independently of nuclear estrogen receptors *in vivo*.

Because *MZgper*<sup>-/-</sup> fish are viable, we asked whether loss of GPER and reduced basal heart rate in embryos might have an effect on adult heart morphology. We dissected hearts from 8-9 month old adult wildtype and *MZgper*<sup>-/-</sup> zebrafish. Female mutants had a mean 47% reduction in atrioventricular (AV) valve width compared to wildtype (Fig. 5E; *MZgper*<sup>-/-</sup>  $33.5 \pm 6.35$   $\mu\text{m}$  (mean  $\pm$  standard deviation),  $n=10$ ; wildtype  $62.49 \pm 18.53$ ,  $n=9$ ,  $p=0.0002$  Student's t test), while male mutants had a mean 40% reduction in AV valve width compared to wildtype (Fig. 5F; *MZgper*<sup>-/-</sup>  $29.39 \pm 6.32$ ,  $n=7$ ; wildtype  $49.14 \pm 9.68$ ,  $n=5$ ,  $p=0.0016$  Student's t test). We also analyzed the single thickest part of AV valve leaflets in each heart and found that mutant valves were on average 45% thinner at their thickest point than wildtype valves from fish of the same sex (female *MZgper*<sup>-/-</sup>  $42.93 \pm 10.38$  vs wildtype  $77.97 \pm 24.32$   $\mu\text{m}$ ,  $p=0.0006$  Student's t test; male *MZgper*<sup>-/-</sup>  $38.17 \pm 11.62$  vs wildtype  $67.19 \pm 24.77$ ,  $p=0.02$  Student's t test). These results are consistent with previous observations that eliminating blood flow in embryos impairs heart valve formation (31). Together, these findings demonstrate a correlation between reduced blood flow in embryos and reduced valve thickness in adults and suggest that GPER regulation of heart rate is important for proper heart valve maturation.

## DISCUSSION

Our results support the hypothesis that GPER acts as an autonomous estrogen receptor *in vivo*. Previous reports using cultured cells demonstrated that fluorescently labeled or isotopic estradiol specifically binds membranes from cells expressing GPER (8, 9). Additionally, estradiol exposure increased cyclic AMP and calcium levels in HEK293 and COS7 cells in a GPER-dependent manner (8, 9), while estradiol exposure increased phosphoinositide 3-kinase activity in SKBR3 breast cancer cell line in a GPER-dependent manner (8). However, because these studies utilized cells that either express artificially high levels of GPER or are tumorigenic, the findings do not address whether GPER acts as an estrogen receptor *in vivo* under normal physiologic conditions. Our genetic and

pharmacologic results strongly suggest that GPER is an estrogen receptor *in vivo*. If estradiol was binding to ER $\alpha$  or ER $\beta$ , and these receptors activated GPER, then we would expect to see no increase in heart rate in *esr1*, *esr2a* or *esr2b* mutants following exposure to estradiol. Instead, all *esr* mutants responded normally to estradiol exposure (Fig. 3), suggesting that ER and GPER signaling pathways are distinct in this context. Consistent with these results, we found *gper* transcript expressed in cells in the brain that lack nuclear estrogen receptor activity (Fig. 4), further supporting the hypothesis that GPER responds to estrogens independently of nuclear estrogen receptors *in vivo*.

A study in mouse hearts also supports the idea that GPER acts as an autonomous estrogen receptor *in vivo*. In adults, estradiol administration reduces cardiac damage following ischemia (32-34). To identify the receptor required for estradiol's protective effects, Kabir and colleagues subjected hearts from male mutant mice lacking either GPER, ER $\alpha$  or ER $\beta$  to ischemia-reperfusion injury in the presence of estradiol or vehicle. Estradiol treatment protected wildtype and ER $\alpha$  and ER $\beta$  mutant mice from injury, but had no effect on GPER mutant mice (35), demonstrating that estradiol exerts its protective effects via GPER, independently of ER $\alpha$  or ER $\beta$ . The extent to which ER and GPER signaling pathways interact likely depends on cell type, developmental stage, sex and/or pathology. Studying the influence of estrogens on heart rate in zebrafish embryos is a powerful *in vivo* system where GPER activity is dissociated from classical nuclear estrogen receptor signaling.

Between 2 and 5 dpf, zebrafish heart rate normally increases (36, 37). Our results support the hypothesis that endogenous estradiol regulates this increase in heart rate. The finding that GPER mutant embryos have lower basal heart rate compared to wildtype embryos implicates endogenous estradiol. Additionally, a recent HPLC analysis of endogenous estradiol concentration in zebrafish embryos found that estradiol concentrations increased from 137 pg/embryo at 48 hpf to 170 pg/embryo at 72 hpf (38). Taken together, these results support the hypothesis that endogenous estradiol regulates heart rate in zebrafish embryos

and larvae. The source of embryonic estradiol, whether synthesized by the embryo or maternally deposited in the yolk, is not known.

Blood flow in embryos is a critical determinant of cardiovascular development (39). Zebrafish embryos in which blood flow is drastically reduced or eliminated exhibited a valve dysgenesis phenotype (31). *MZgper*<sup>-/-</sup> embryos exhibit a ~20% reduced heart rate compared to wildtype, yet are viable, allowing us to examine the adult heart following reduced basal heart rate in embryos. Based on the heart rate phenotype in *MZgper*<sup>-/-</sup> embryos and the detection of *gper* transcripts in the brain but not the heart, we propose that the reduced heart rate in GPER mutant embryos causes a reduction in blood flow that prevents heart valves from maturing properly and manifests in adults as thinner atrioventricular valves compared to wildtype. While *gper* transcript is expressed in the adult zebrafish brain (2), it is not known whether *gper* is expressed in the juvenile or adult zebrafish heart, where it could directly influence valve cell division and/or valve cell survival separately from influencing heart rate and blood flow.

There are several mechanisms by which GPER activity in the brain could regulate heart rate. Neurons that express GPER could be part of a chain of neurons that ultimately terminates in motor neurons that innervate the heart and regulate contractions. It is not known whether the zebrafish heart is innervated by 50 hpf and thus it is unclear whether GPER is influencing sympathetic or parasympathetic neuron activity. Parasympathetic neurons terminate at the heart and activate muscarinic acetylcholine receptors to reduce heart rate. In contrast, sympathetic neurons terminate at the heart and activate beta-adrenergic receptors to increase heart rate. GPER could be activating sympathetic activity or reducing parasympathetic activity. However, there is conflicting evidence as to whether autonomic control of the heart occurs in two-day old zebrafish embryos. Milan and colleagues reported that propranolol, a beta-adrenergic receptor antagonist, reduced heart rate in 2 dpf embryos, while isoproterenol, a beta-adrenergic receptor agonist, and atropine, a muscarinic acetylcholine receptor antagonist, both increased heart rate (40). These results suggest that at 2 dpf,

the zebrafish embryo heart can respond to sympathetic and parasympathetic activity. In contrast, Schwerte and colleagues reported that atropine and propranolol did not influence heart rate in embryos younger than 5 dpf, while zebrafish failed to respond to adrenergic stimulation before 4 dpf (41). Future studies are required to determine when functional autonomic innervation of the zebrafish heart initially occurs.

Even if the autonomic nervous system does not regulate heart rate in 2 dpf zebrafish embryos, GPER can still function in the brain to regulate heart rate. Previous work suggests that GPER influences neurotransmitter release (42). Therefore, GPER activity could trigger neuronal activity that leads to systemic release of humoral factors, such as thyroid hormone, known to regulate heart rate (30). Expression of *gper* transcript in the ventral hypothalamus / pituitary (Figure 4) is consistent with this hypothesis.

While our results illuminate GPER signaling in the context of embryonic heart rate, it is not clear to what extent GPER influences heart rate at later stages of development. At larval, juvenile and adult stages it is impossible to assess heart rate without immobilizing or anesthetizing zebrafish, manipulations that themselves influence heart rate. In adult mice with mutations in GPER, there was no significant difference in basal heart rate between mutant and wildtype mice of either sex (16, 17, 43). It is possible that GPER regulates heart rate in embryos but not in adults. Additionally, heart rate in GPER mutant mice was assayed using general anesthesia, which is known to depress heart rate compared to conscious mice (44). Anesthesia may mask the effect of GPER on basal heart rate that we observe in conscious animals. We also cannot exclude the possibility that the effects of GPER on heart rate are specific for zebrafish.

In summary, this study identified a role for GPER in the regulation of embryonic heart rate. The zebrafish estrogen receptor mutants we developed enable experiments to rapidly and conclusively identify the causative estrogen receptor associated with any estrogen signaling phenotype, as demonstrated with the estradiol-dependent increase in heart rate reported here. This has significant implications for studies of estrogenic environmental endocrine



disruptors, which are frequently tested on zebrafish to identify effects on embryonic development, organ formation and function (45). Zebrafish estrogen receptor mutants can now be used to determine whether such effects are specific for estrogen receptors and to identify the precise receptor target. Our results also establish a need to consider the impact on cardiac function when considering the toxicity of estrogenic environmental endocrine disruptors.

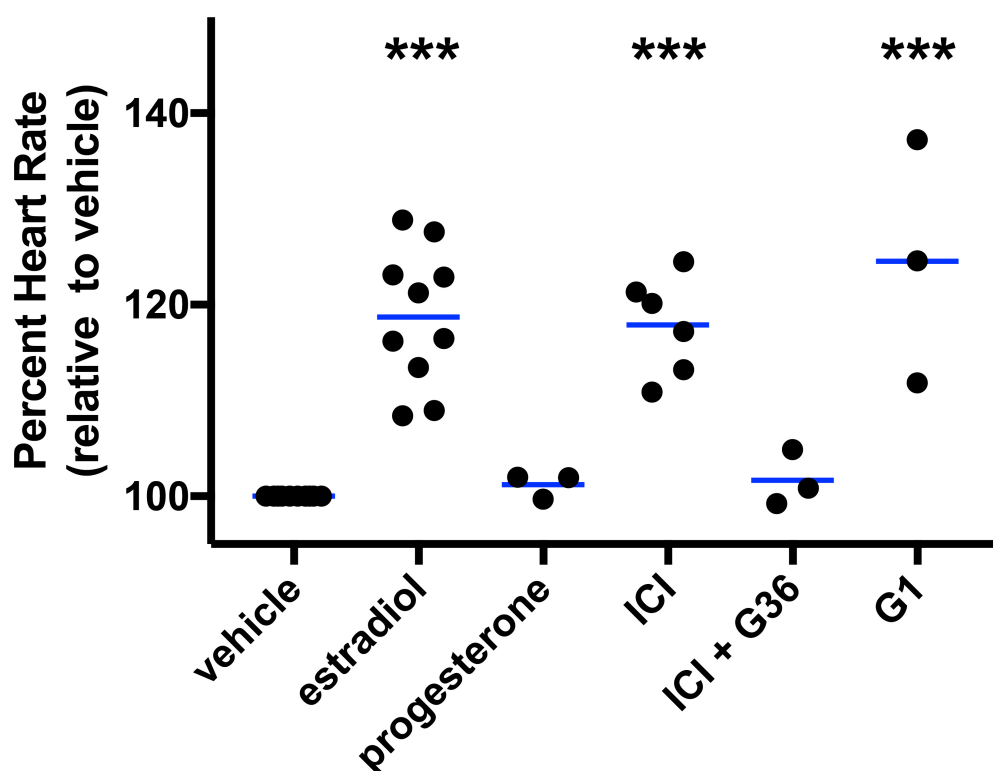

**Figure 1. Estradiol and GPER agonists increased heart rate in zebrafish embryos.**

Wildtype embryos were incubated in water containing vehicle (0.1% DMSO), estradiol (3.67  $\mu$ M, ER/GPER agonist), progesterone (1  $\mu$ M), ICI (10  $\mu$ M ICI182,780, ER antagonist/GPER agonist), G1 (1  $\mu$ M, GPER agonist), G36 (1  $\mu$ M, GPER antagonist) or two chemicals in combination at 49 hours post fertilization and heart rates were measured 1 hour following treatment. \*\*\*,  $p < 0.0001$  compared to vehicle, ANOVA with Dunnett's test. Each black circle represents the mean heart rate from a single clutch of embryos (3-16 embryos per clutch). Clutches in the same treatment group were assayed on different days. Horizontal blue lines are the mean of each treatment.

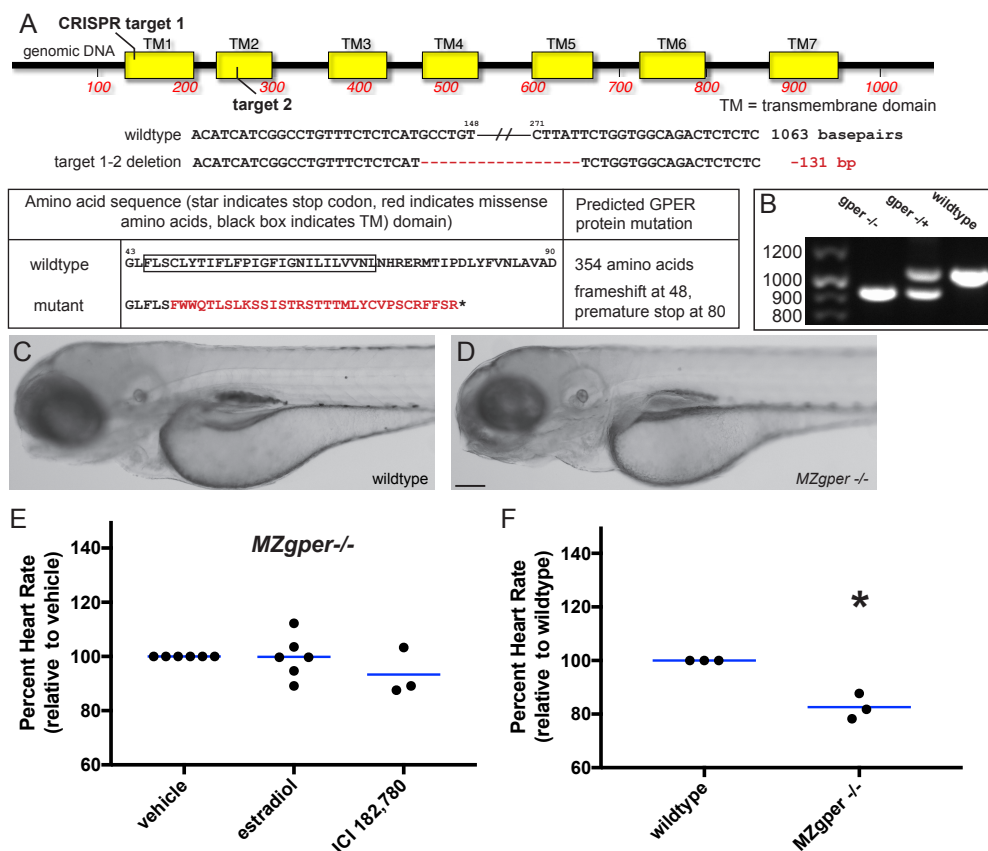

**Figure 2. Abnormal heart rate in *gper* mutant zebrafish.** (A) Genomic DNA of *gper*<sup>ub102</sup> zebrafish contains a 131 basepair deletion in the *gper* coding region between CRISPR guide RNA targets 1 and 2, resulting in a premature stop codon in the GPER protein. Red dashes indicate DNA deletions, mutated amino acids are shown in red. (B) Genomic DNA was harvested from individual embryos, *gper* was PCR amplified and separated on an agarose gel to identify deletion mutations. (C-D) 3 day post fertilization wildtype and maternal zygotic *gper*<sup>ub102</sup> homozygous larvae (*MZgper*<sup>-/-</sup>) exhibit similar gross morphology. Images are lateral views, anterior to the left, dorsal to the top. Scale bar, 500  $\mu$ m. (E) Neither estradiol (ER/GPER agonist, 3.67  $\mu$ M) nor ICI182,780 (ER antagonist/GPER agonist, 10  $\mu$ M) changed heart rate significantly compared to vehicle (0.1% DMSO) in *MZgper*<sup>-/-</sup>, two-way ANOVA followed by F test,  $p=0.27$ . (F) *MZgper*<sup>-/-</sup> exhibited lower basal heart rate than age-matched wildtype embryos. \*,  $p<0.05$  compared to wildtype, paired t test. Each black circle represents the mean heart rate from a single clutch of embryos ( $\geq 7$  embryos per clutch). Clutches in the same treatment group or genotype were assayed on different days. Horizontal blue lines are the mean of each treatment.

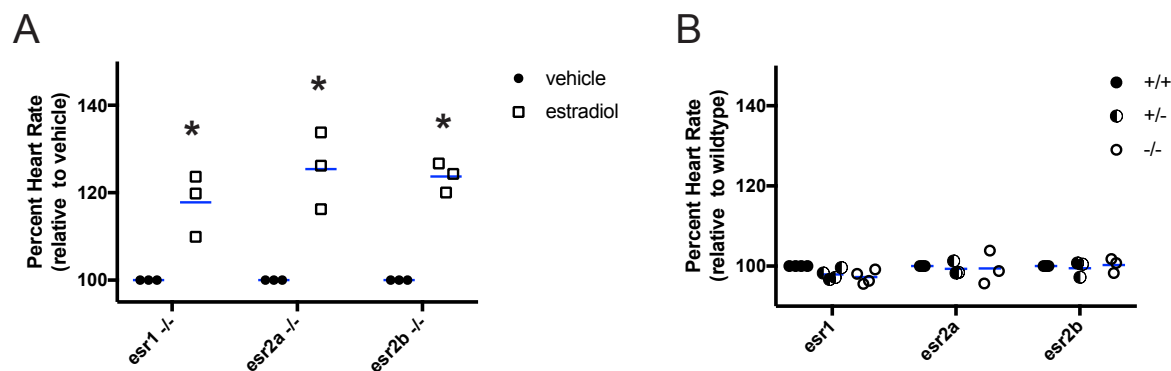

**Figure 3. Normal heart rate in nuclear estrogen receptor mutants.** (A) Homozygous mutant embryos at 49 hour post fertilization were incubated in water containing estradiol (ER/GPER agonist, 3.67  $\mu$ M) or vehicle (0.1% DMSO) and heart rate was measured 1 hour post treatment. Estradiol increased heart rate compared to vehicle in zebrafish with homozygous mutations in ER $\alpha$  (*esr1* -/-), ER $\beta$ 1 (*esr2a* -/-), ER $\beta$ 2 (*esr2b* -/-). \* $p$ <0.05 compared to vehicle within genotype, paired t-test. (B) Basal heart rate was measured at 50 hours post fertilization in embryos reared in untreated water. Heart rate was not significantly different in homozygous mutant (-/-) embryos compared to heterozygous (-/+) and wildtype (+/+) siblings for each *esr* mutant, two-way ANOVA. Each black circle represents the mean heart rate from a single clutch of embryos (4-8 embryos per clutch). Clutches in the same treatment group or genotype were assayed on different days. Horizontal blue lines are the mean of each treatment.

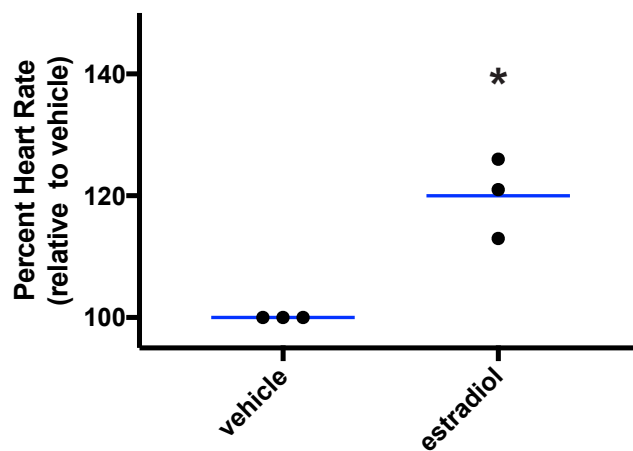

**Figure S1. Zygotic *gper* mutant embryos are sensitive to estradiol.** Zygotic homozygous *gper* mutant embryos were incubated in water containing estradiol (ER/GPER agonist, 3.67  $\mu$ M) or vehicle control (0.1% DMSO) at 49 hours post fertilization and heart rates were measured 1 hour post treatment. \*,  $p < 0.05$  compared to vehicle, paired t test. Each black circle represents the mean heart rate from a single clutch of embryos ( $\geq 6$  embryos per clutch). Clutches in the same treatment group were assayed on different days. Horizontal blue lines are the mean of each treatment.

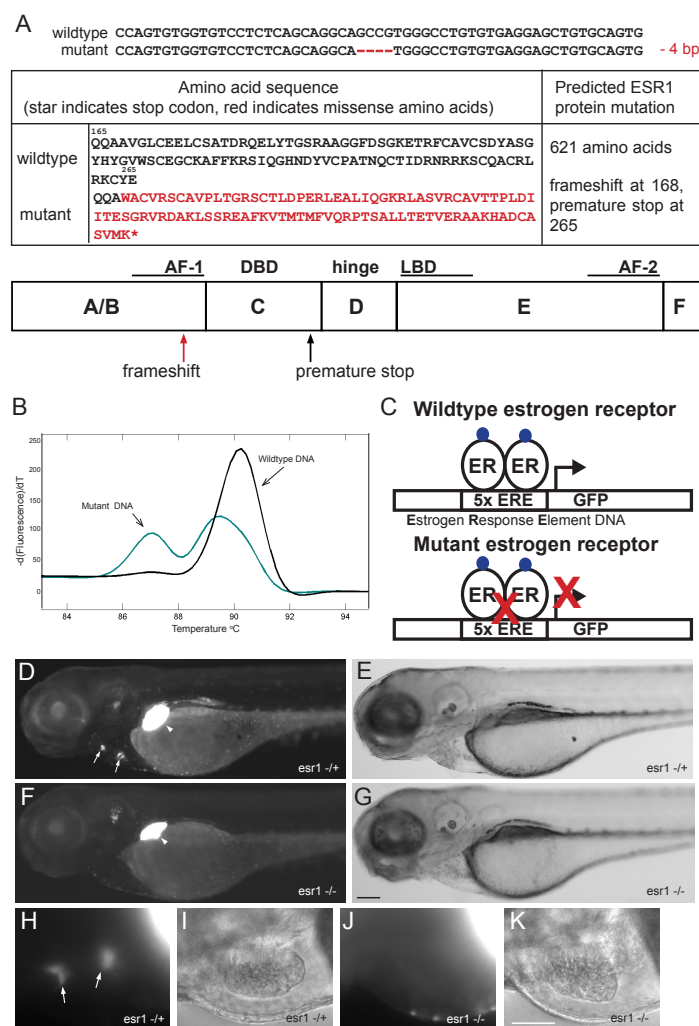

**Figure S2. Generation and validation of *esr1* mutant zebrafish.** (A) Genomic DNA of *esr1<sup>uab118</sup>* zebrafish contains a 4 basepair deletion in the *esr1* coding region, resulting in a premature stop codon in the Esr1 (ER $\alpha$ ) protein. Nucleotide deletions are shown as red dashes, amino acid mutations are in red. Map indicates site of frameshift mutation and premature stop codon (AF-1, activating function 1 domain; DBD, DNA binding domain; LBD, ligand binding domain; AF-2, activating function 2 domain). (B) High resolution melting curve analysis was used to distinguish mutants from wildtype. Curves represent DNA amplified from a wildtype AB (black) or *esr1<sup>uab118</sup>* mutant zebrafish (cyan). (C) Strategy for validating zebrafish estrogen receptor mutants using transgenic 5xERE:GFP zebrafish. Mutants were generated on a transgenic background where estrogen receptor (ER) transcriptional activity is marked by green fluorescent protein (GFP) expression. Following exposure to estradiol, loss-of-function mutants should exhibit reduced fluorescence in cells expressing *esr1*. (D-K) 2-day post fertilization embryos were exposed to 367 nM (100 ng/mL) estradiol, live fluorescent images (D, F, H, J) and corresponding brightfield images (E, G, I, K) were taken at 3 d. 5xERE:GFP<sup>c262</sup>; *esr1<sup>uab118</sup>* homozygous larvae (*esr1* -/-) exhibit normal morphology, but lack fluorescence in heart valves, whereas heterozygotes (*esr1* +/-) exhibit fluorescent heart valves. High magnification images of the heart are shown in H-K. Arrows indicate heart valves, arrow head indicates liver. Images are lateral views, anterior to the left, dorsal to the top. Scale bars, 500  $\mu$ m (D-G), 100  $\mu$ m (H-K).

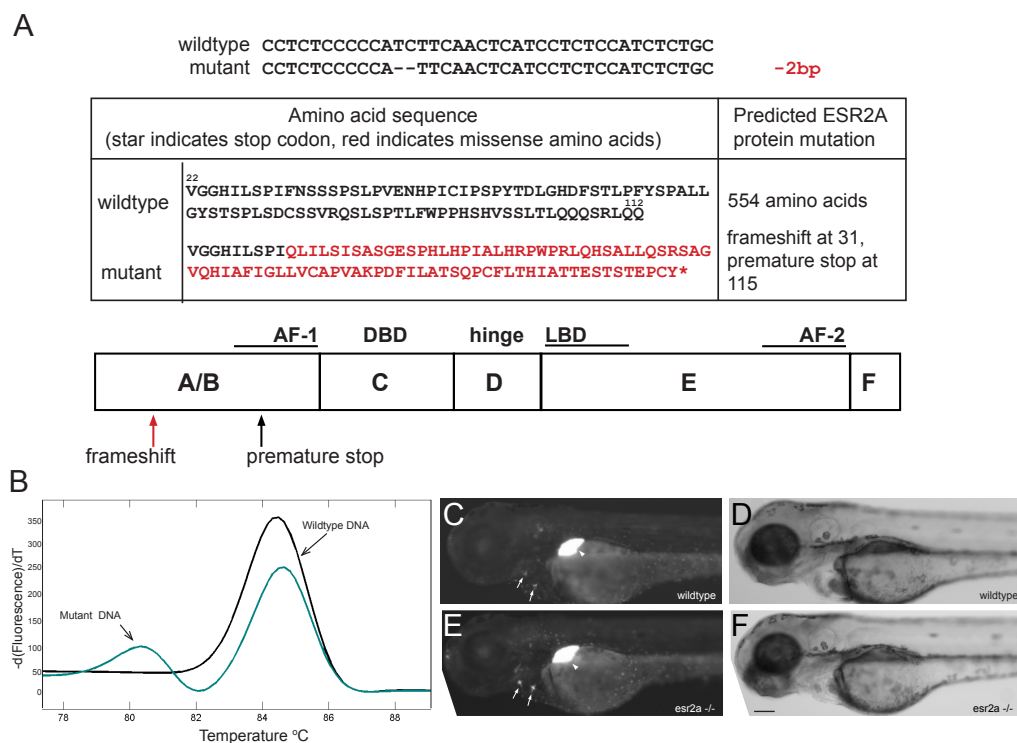

**Figure S3. Generation of *esr2a* mutant zebrafish.** (A) Genomic DNA of *esr2a*<sup>uab134</sup> zebrafish contains an 2 basepair deletion (red dashes) in the *esr2a* coding region, resulting in a premature stop codon in the Esr2a (ERβ1) protein. Amino acid mutations are in red. Map indicates frameshift mutation and premature stop codon in the Esr2a protein. AF-1, activating function 1 domain; DBD, DNA binding domain; LBD, ligand binding domain; AF-2, activating function 2 domain. (B) High resolution melting curve analysis was used to distinguish mutants from wildtype. Curves represent DNA amplified from a wildtype AB (black) or *esr2a*<sup>uab134</sup> mutant zebrafish (cyan). (C-F) *5xERE:GFP<sup>c262</sup>* and *5xERE:GFP<sup>c262</sup>;esr2a<sup>uab134</sup>* (*esr2a*<sup>-/-</sup>) 3-day post fertilization (d) larvae were exposed to 367 nM (100 ng/mL) estradiol. Live fluorescent images (C, E) and corresponding brightfield images (D, F) were captured at 4 d. *esr2a*<sup>-/-</sup> larvae exhibit normal morphology and fluorescence, consistent with data demonstrating that *esr2a* is not expressed during these developmental stages. Arrows indicate heart valves, arrow head indicates liver. Images are lateral views, anterior to the left, dorsal to the top. Scale bar, 500 μm



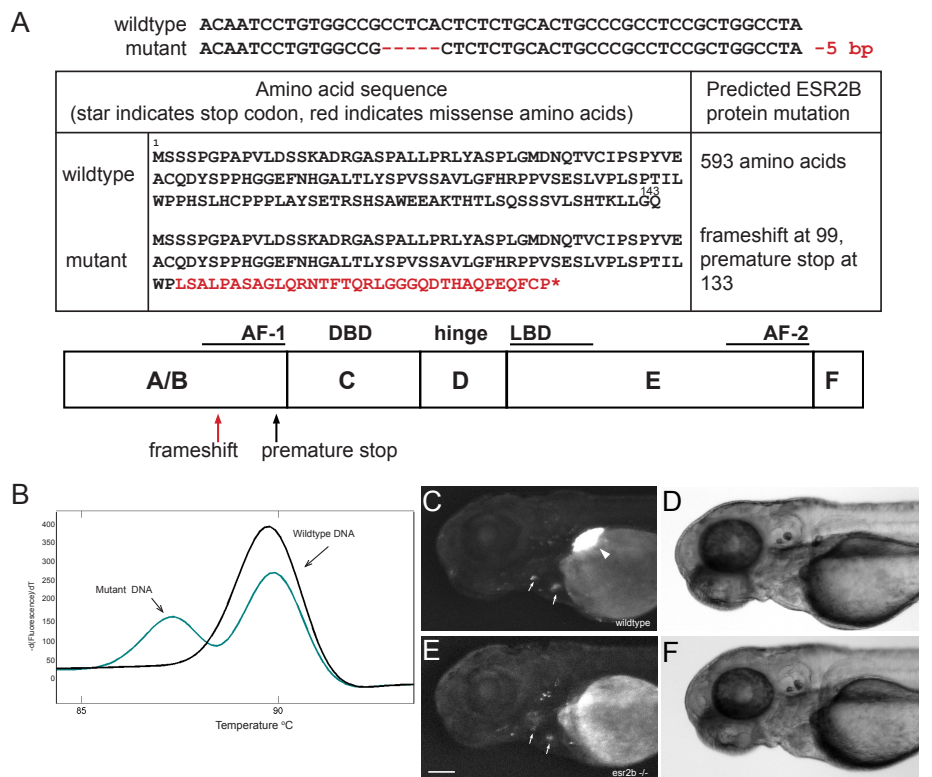

**Figure S4. Generation and validation of *esr2b* mutant zebrafish.** (A) Genomic DNA of *esr2b<sup>uab127</sup>* zebrafish contains a 5 basepair deletion (red) in the *esr2b* coding region, resulting in a premature stop codon in the ESR2b (ERβ2) protein. Amino acid mutations are in red. Map indicates frameshift mutation and premature stop codon in the ESR2b protein. AF-1, activating function 1 domain; DBD, DNA binding domain; LBD, ligand binding domain; AF-2, activating function 2 domain. (B) High resolution melting curve analysis was used to distinguish mutants from wildtype. Curves represents DNA amplified from a wildtype AB (black) or *esr2b<sup>uab127</sup>* mutant zebrafish (cyan). (C-F) *5xERE:GFP<sup>c262</sup>;esr2b<sup>uab127</sup>* 3-day post fertilization (d) larvae were exposed to 367 nM (100 ng/mL) estradiol. Live fluorescent images (C, E) and corresponding brightfield images (D, F) were captured at 4 d. *5xERE:GFP<sup>c262</sup>;esr2b<sup>uab127</sup>* homozygous larvae (*esr2b* *-/-*) exhibit normal morphology, but lack fluorescence in the liver. Arrows indicate heart valves, arrow head indicates liver. Images are lateral views, anterior to the left, dorsal to the top. Scale bar = 100 μm.

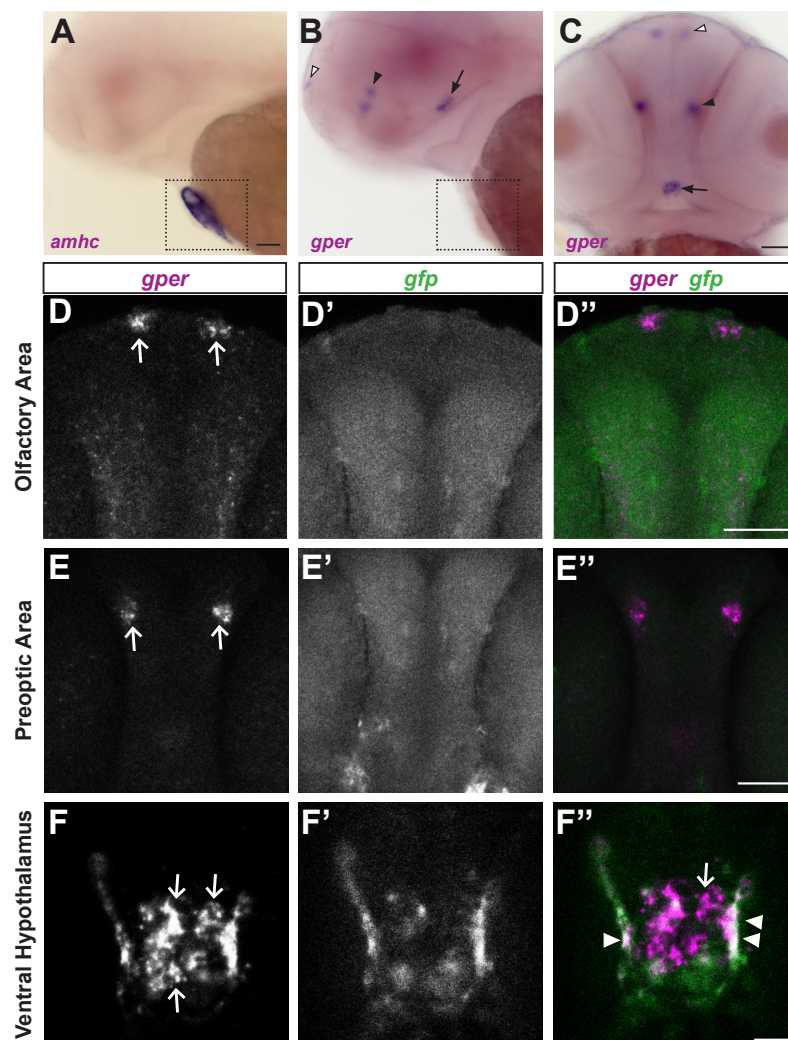

**Figure 4. *gper* expression in the brain.** (A-C) Whole mount colorimetric *in situ* hybridization was performed on wildtype embryos at 50 hours post fertilization (hpf). (A) *amhc* (alpha-myosin heavy chain) antisense RNA labels atrial myocardial cells in the heart (boxed). (B, C) *gper* antisense RNA labels a bilaterally symmetric cluster of cells in the olfactory area (white arrowheads) and preoptic area (black arrowhead) and a medial cluster of cells in the ventral hypothalamus (arrows). No label was detected in the heart. Lateral views with anterior to the left (A,B), ventral view with anterior to the top (C), scale bars = 100  $\mu$ m. (D-F) Double fluorescent *in situ* hybridization performed on 48 hpf *Tg(5xERE:GFP)c262* embryos following overnight exposure to 100 ng/ml estradiol. *gfp* marks cells with active nuclear estrogen receptors. Confocal images of selected Z-slices (0.975  $\mu$ m) show that *gper* is expressed in the olfactory area (D) and preoptic area (E) in cells lacking *gfp* (D'', E'', scale bars = 50  $\mu$ m). In the ventral hypothalamus (F), *gper* is expressed in a medial cluster of cells lacking *gfp* (arrows, F, F''), whereas *gper* is expressed together with *gfp* more laterally (arrowheads, F'', scale bar = 10  $\mu$ m). In merged images, *gper* is magenta, *gfp* is green and areas of colocalization are white. Dorsal views, anterior to the top.

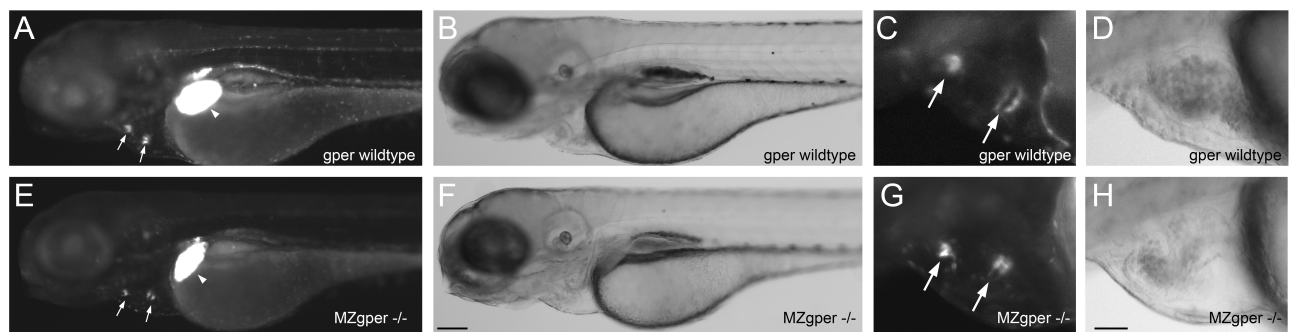

**Figure S5. Nuclear estrogen receptor transcriptional activity is normal in *gper* mutant zebrafish.** (A-H) Maternal zygotic *gper*<sup>fl<sup>90/102</sup></sup> homozygous larvae on the *5xERE:GFP*<sup>262</sup> transgenic background (*MZgper*<sup>-/-</sup>) were exposed to 367 nM (100 ng/mL) estradiol at 2-days post fertilization (2 d). Fluorescence (A, C, E, G) and corresponding brightfield images (B, D, F, H) were taken at 3 d. Fluorescence in the heart valves (arrows) and liver (arrow heads) is similar between *MZgper*<sup>-/-</sup> and wildtype larvae. C, D, G, H, High magnification images of heart. Images are lateral views, anterior to the left, dorsal to the top. Scale bars, 500  $\mu$ m (C-F), 100  $\mu$ m (G-J).

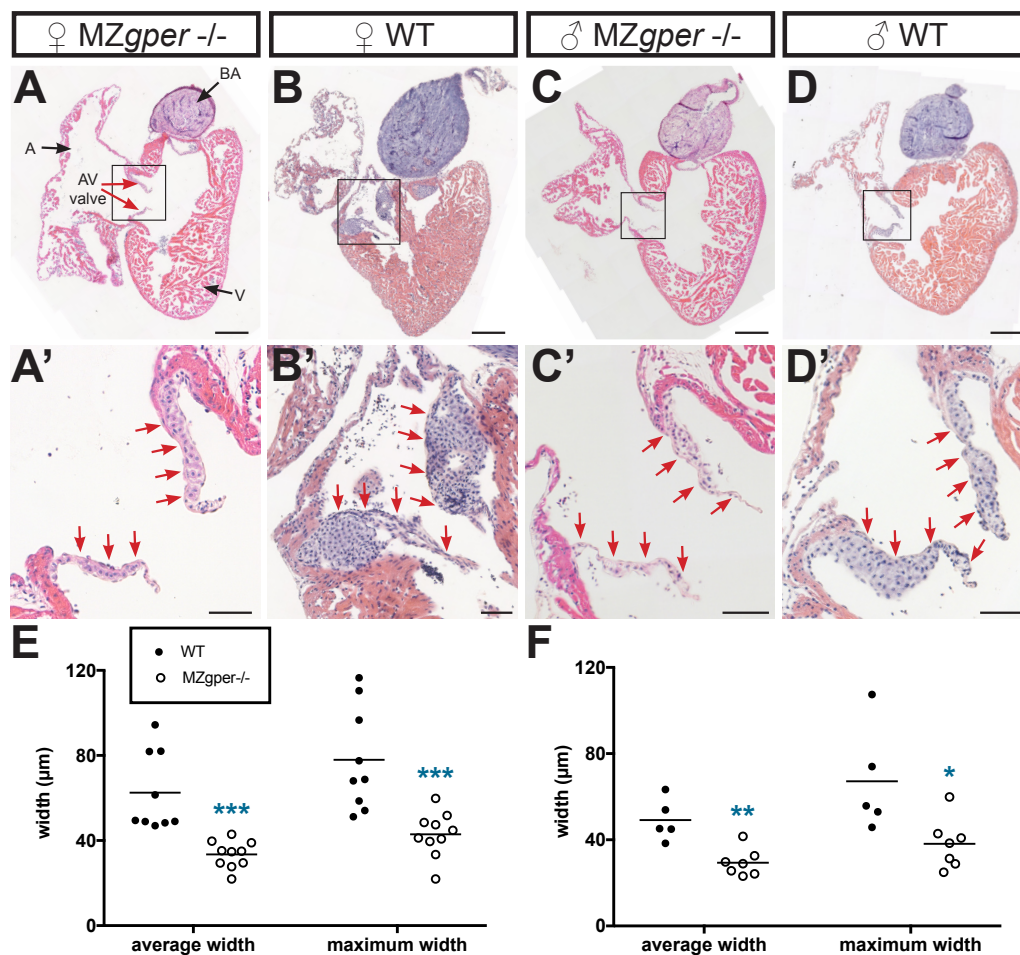

**Figure 5. GPER mutants exhibit decreased atrioventricular (AV) valve width in adulthood.** (A-L) Representative images of *MZgper*<sup>-/-</sup> and wildtype (wt) hearts. (A-D) 5  $\mu$ m coronal sections through the heart, stained with H&E. Atrium (A), ventricle (V), and bulbus arteriosus (BA) indicated with black arrows, AV valve leaflets are indicated with red arrows. Black boxes show the portion of the image that is digitally enlarged in A'-D' to highlight AV valve morphology. Scale bars in A-D represent 200 $\mu$ m; scale bars in A'-D' represent 50 $\mu$ m. (E,F) Graphs comparing average and maximum AV valve width between *MZgper*<sup>-/-</sup> and wildtype hearts in females (E) and males (F). Width was measured at the widest part of the valve over multiple coronal sections from the middle of the heart, perpendicular to the long axis of the valve, and corrected for standard length of each fish. Each circle represents measurements from a single fish, horizontal black lines are the mean width from each genotype. \* $p < 0.05$ ; \*\* $p < 0.01$ ; \*\*\* $p < 0.001$ , unpaired Student's t test.

## Materials and Methods

### Zebrafish

Zebrafish were raised at 28.5°C on a 14-h light, 10-h dark cycle in the UAB Zebrafish Research Facility in an Aquaneering recirculating water system (Aquaneering, Inc., San Diego, CA). Wildtype zebrafish were AB strain (46) and all mutant and transgenic lines were generated on the AB strain. To visualize nuclear estrogen receptor activity, transgenic line *Tg(5xERE:GFP)<sup>c262/c262</sup>* was used for all studies unless otherwise mentioned (5). All procedures were approved by the UAB Institutional Animal Care and Use Committee.

### Embryo collection

Embryos were collected during 10 minute intervals to ensure precise developmental timing within a group. Embryos were placed in Petri dishes containing E3B (60X E3B: 17.2g NaCl, 0.76g KCl, 2.9g CaCl<sub>2</sub>·2H<sub>2</sub>O, 2.39g MgSO<sub>4</sub> dissolved in 1 liter Milli-Q water; diluted to 1X in 9 liter Milli-Q water plus 100 µL 0.02% methylene blue) and placed in an incubator at 28.5°C on a 14-h light, 10-h dark cycle. At 24 hours post fertilization (hpf), embryos were incubated in E3B containing 200 µM 1-phenyl 2-thiourea (PTU) to inhibit pigment production (46). Between 24 and 48 hpf, embryos were manually dechorionated and randomly divided into control and experimental treatment groups (10 to 30 embryos per treatment group) in 60mm Petri dishes and kept at 28.5°C until 49 hpf.

### Embryo treatments

At 49 hpf, embryos were incubated in E3B with estrogen receptor modulator(s) at 28.5°C for 1 hour. Estrogen receptor modulator treatments consisted of: 3.67 µM E2 (17β-estradiol, Sigma E8875; purity ≥ 98%), 10 µM ICI182,780 (fulvestrant, Sigma I4409; purity >98%), 1 µM G1 (Azano, AZ0001301; purity ≥ 98%), 1 µM G36 (Azano, AZ-0001303; purity ≥ 98%), 1 µM progesterone (Sigma P0130; purity ≥ 99%) or vehicle (0.1% dimethylsulfoxide (DMSO), Fisher D128-500; purity ≥ 99.9%). All chemical stocks were made in 100% DMSO at 1000x and diluted in E3B embryo media to final concentration at the time of treatment. For rescue experiments (ICI182,780 + G36), final DMSO concentration was 0.2%. There was no difference in heart rate between embryos incubated in 0.1% or 0.2% DMSO (not shown). All vehicle controls shown in figures are 0.1% DMSO.

### Measurement of heart rates

All embryos were reared at 28.5°C and heart rate was measured at room temperature. Following one hour incubation in treatment compounds at 28.5°C, heart rate (beats per minute, bpm) was calculated by counting the number of heart beats in fifteen seconds and multiplying that number by four. Prior to measurements, each dish was removed from the incubator and placed under the microscope light for 4 minutes at room temperature, allowing embryos to acclimate to the light and eliminate any effect of the startle response. Control groups were counted first and last to ensure that the overall heart rate did not increase during the duration of counting due to natural increases in heart rate during development. All heart rates were measured on a Zeiss Stemi 2000



dissecting microscope with a halogen transmitted light base (Carl Zeiss Microimaging, Thornwood, NJ).

### Generation of guide RNA and Cas9 mRNA

Plasmids pT7-gRNA and pT3T3-nCas9n were obtained from Addgene (numbers 46759, 46757) (26). pT7-gRNA was digested simultaneously with BsmBI, BglII and Sall for one hour at 37 °C followed by one hour at 55 °C. To generate *esr2a*, *esr2b* and *gper* gRNAs, oligonucleotides containing target site sequences (see table below) were synthesized by Invitrogen. Oligos were hybridized to each other using NEBuffer3 restriction enzyme buffer (New England Biolabs) to generate double stranded target DNA and annealed into digested pT7-gRNA using Quick T4 DNA Ligase (New England Biolabs) as previously described (26). Guide RNAs were synthesized using the MegaShortScript T7 Kit (Life Technologies) using the relevant modified pT7-gRNA vector linearized with BamHI as a template. Guide RNA was purified using the RNA clean & concentrator kit (Zymo Research). To generate *esr1* guide RNA, target-specific oligonucleotides containing the SP6 (5'-ATTTAGGTGACACTATA) promoter sequence, a 20 base target site without the PAM, and a complementary region were annealed to a constant oligonucleotide encoding the reverse-complement of the tracrRNA tail as described (47). This oligo was used as a template for in vitro transcription using the MegaShortScript Sp6 Kit (Life Technologies). To generate Cas9 mRNA, the pT3TS-nCas9n plasmid was linearized with XbaI and transcribed using the mMessage mMachine T3 kit (Life Technologies) and purified using RNA clean & concentrator kit (Zymo Research). RNA concentration was quantified using a Nanodrop spectrophotometer (Nanodrop ND-1000, ThermoFisher).

Target site sequences for *gper*, *esr1*, *esr2b* and *esr2a* oligonucleotides:

| Gene                    | CRISPR target (PAM in red)  | Oligo 1                    | Oligo 2                     |
|-------------------------|-----------------------------|----------------------------|-----------------------------|
| <i>esr1</i>             | GTCCTCTCAGCAGGCA<br>GCCGTGG | ATTTAGGTGACACTA<br>TA      | GTTTTAGAGCTAGAA<br>ATAGCAAG |
| <i>esr2a</i>            | GGAGAGGATGAGTTGA<br>AGATGGG | TAGGAGAGGATGAG<br>TTGAAGAT | AAACATCTTCAACTC<br>ATCCTCT  |
| <i>esr2b</i>            | GGCGGGCAGTGCAGA<br>GAGTAGG  | TAGGCGGGCAGTGC<br>AGAGAGTG | AAACCACTCTCTGCA<br>CTGCCCG  |
| <i>gper</i><br>target 1 | GGCTGTGGCAGATCTT<br>ATTCTGG | TAGGCTGTGGCAGA<br>TCTTATTC | AAACGAATAAGATCT<br>GCCACAG  |
| <i>gper</i><br>target 2 | GGAAAAGGAAAATGGT<br>GTACAGG | TAGGAAAAGGAAAAT<br>GGTGAC  | AAACGTACACCATTT<br>TCCTTTT  |

### Embryo injections

One-cell-stage embryos were injected using glass needles pulled on a Sutter Instruments Fleming/Brown Micropipette Puller, model P-97 and a regulated air-pressure micro-injector (Harvard Apparatus, NY, PL1–90). Each embryo was injected with a 1 nl solution of 150 ng/μl of Cas9 mRNA, 50 ng/μl of gRNA and 0.1% phenol red. Mixtures were injected into the yolk of each embryo. Injected embryos were raised to adulthood and crossed to wildtype fish (either AB or *Tg5xERE:GFP<sup>c262</sup>*) to generate F1 embryos. F1 offspring with heritable mutations were sequenced to identify loss of function mutations.

### **Genomic DNA isolation**

Individual embryos or tail biopsies from individual adults were placed in 100 μL ELB (10 mM Tris pH 8.3, 50 mM KCl, 0.3% Tween 20) with 1 μL proteinase K (800 U/ml, NEB) in 96 well plates, one sample per well. Samples were incubated at 55°C for 2 hours (embryos) or 8 hours (tail clips) to extract genomic DNA. To inactivate Proteinase K, plates were incubated at 98°C for 10 minutes and stored at -20°C.

### **High resolution melt curve analysis**

PCR and melting curve analysis was performed as described (48). PCR reactions contained 1 μl of LC Green Plus Melting Dye (BioFire Diagnostics), 1 μl of Ex Taq Buffer, 0.8 μl of dNTP Mixture (2.5 mM each), 1 μl of each primer (5 μM), 0.05 μl of Ex Taq (Takara Bio Inc), 1 μl of genomic DNA, and water up to 10 μl. PCR was performed in a Bio-Rad C1000 Touch thermal cycler, using black/white 96 well plates (Bio-Rad HSP9665). PCR reaction protocol was 98°C for 1 min, then 34 cycles of 98°C for 10 sec, 60°C for 20 sec, and 72°C for 20 sec, followed by 72°C for 1 min. After the final step, the plate was heated to 95°C for 20 sec and then rapidly cooled to 4°C. Melting curves were generated with either a LightScanner HR 96 (Idaho Technology) over a 70–95°C range and analyzed with LightScanner Instrument and Analysis Software (V. 2.0.0.1331, Idaho Technology, Inc, Salt Lake City, UT), or with a Bio-Rad CFX96 Real-Time System over a 70–95°C range and analyzed with Bio-Rad CFX Manager 3.1 software.

### **Live imaging**

Live zebrafish embryos and larvae were visualized using a Nikon MULTIZOOM AZ100 equipped with epi-fluorescence and an Andor Clara digital camera unless otherwise noted. To validate mutants with 5xERE reporter activity, larvae were treated overnight with 100 ng/mL estradiol beginning at 2-3 dpf. Following overnight treatment, larvae were washed in E3B, anesthetized with 0.04% tricaine and imaged in Petri dish containing E3B. For Fig. S1 H-K, larvae were mounted in bridged coverslips in E3B with 0.04% tricaine (46). Images were captured on a Zeiss Axio Observer.Z1 fluorescent microscope equipped with an Axio HRm camera and Zen Blue 2011 software (Carl Zeiss Microscopy, Oberkochen, Germany). Adjustments, cropping and layout were performed using Photoshop CS6 and InDesign CS6 (Adobe Systems Inc., San Jose, CA).

### **RNA in situ hybridization**

For synthesis of RNA probes, full-length *gper* open reading frame was amplified by PCR from genomic DNA extracted from 3 dpf larvae (*gper* is a single exon gene and therefore the open reading frame sequence is identical in genomic and cDNA) using primers 5'-ATGGAGGAGCAGACTACCAATGTG-3' and 5'-



CTACACCTCAGACTCACTCCTGACAG-3' and TA cloned into pCR2.1 vector (Invitrogen). *amhc* and *gfp* probes were used as described (5, 49). All clones were verified by sequencing. Digoxigenin-labeled antisense RNA and FITC-labeled antisense RNA were transcribed using T7 and T3 polymerase, respectively, as previously described (5). Colorimetric whole-mount *in situ* hybridization was performed on zebrafish embryos and larvae as described previously, using 5% dextran in the hybridization buffer (50, 51). Following colorimetric *in situ* hybridization, embryos were sequentially cleared in glycerol (25%, 50%, 75% in phosphate buffered saline), mounted in 4% low-melting temperature agarose, and imaged using a Zeiss Axio Observer.Z1 microscope with Zeiss Axio MRc5 camera and Zen Blue 2011 software. Fluorescent *in situ* hybridization (FISH) was performed as previously described (51) with the following modifications: After rehydration, Proteinase K treatment was extended to 35 minutes. Following hybridization, embryos were washed in 2xSSC prior to being placed in PBT. Embryos were blocked in 2% Roche blocking reagent in 100 mM Maleic acid, 150 mM NaCl, pH 7.5 (52). For double labeling, following development of anti-DIG-POD antibody, reaction was inactivated in 100 mM glycine pH 2 for 10 minutes then incubated in anti-FITC antibody. Following fluorescent *in situ* hybridization, embryos were cleared in 50% glycerol, mounted on a bridged coverslip and imaged using a Nikon A1/R scanning confocal microscope with Nikon Advanced Elements software.

### Histology on adult zebrafish hearts

Adult wild-type ( $n=15$ ) and *MZgper*<sup>-/-</sup> ( $n=17$ ) zebrafish at 8-9 months of age were used for heart dissections. Zebrafish were anesthetized in 0.2 mg/mL tricaine, measured with a digital caliper to obtain standard length (SL) (53), and decapitated dorsal to the pectoral fin, then hearts were dissected with forceps in phosphate buffered saline (PBS). Hearts were examined for structural integrity and fixed in 1 mL of 10% formaldehyde in PBS at 4°C for 16-20 hours overnight. Whole hearts were washed three times in PBS. To confirm heart integrity following dissection and fixation, whole hearts were imaged on a Nikon SMZ1500 stereomicroscope equipped with a Nikon DS-Qi1MC camera. Intact, properly dissected hearts were embedded in 10-15  $\mu$ L of Histogel (Thermo Scientific) on 0.8  $\mu$ m AA Millipore filter paper and oriented with atrium and ventricle in the same horizontal plane to ensure downstream collection of coronal sections. Histogel-embedded hearts were placed in tissue cassettes (Fisher Scientific #22-272420) and allowed to set on ice for 5 minutes. Excess Histogel was trimmed without disturbing the heart. Cassettes were closed and stored in 70% ethanol until further processing. Hearts were processed routinely into paraffin, embedded, sectioned at 5  $\mu$ m and stained with hematoxylin and eosin (H&E). Bright-field images of sections were obtained using a Zeiss Axio Observer.Z1 microscope with a Zeiss Axio MRc5 camera and 20x objective (NA 0.8). Tiled images were captured and fused using the stitching algorithm of Zeiss ZEN 2 blue edition software. Cross-sectional length measurements were obtained by taking the mean of 6 sections from each heart (on average) determined to be in the middle of the heart by AV valve visibility. In each section, the thickness of the largest valve leaflet was measured perpendicular to the long axis of the valve. Zebrafish growth and size vary within groups of similarly aged adult fish (53). Therefore, measurements for each sex were normalized to standard length (SL), an established measure of postembryonic zebrafish development (53), by dividing the individual measurements for each fish into the mean SL for that sex. Comparisons between genotypes for each sex were made with two-tailed, unpaired Student's *t* test. Statistical significance was accepted at a *P* value of <0.05.

## Experimental design and data analysis

Heart rate assays were conducted in separate experiments. Each experiment included comparing groups (treated vs untreated or mutant vs wildtype) using at least 3 embryos per group with all embryos from the same clutch. All experiments were replicated for at least 3 times ( $n \geq 3$ ) using different clutches on different days. This is essentially a complete block design with clutch/day as block. Mean heart rate of individual embryos from a clutch was used for comparing treatment groups (or mutant groups) within experiments using two-way ANOVA controlling for clutch/day effect. The overall treatment effect (or the genotype effect in some experiments) was tested using F test. If it was significant, Dunnett's test was then used to compare each treatment group with the vehicle group or mutant group with the wildtype group. For some special individual pairs of comparisons, paired t test was used. Significance level is 0.05. All the analyses were conducted using R (version 3.0.2). Graphs were produced using GraphPad Prism 7.0a software.

**Acknowledgements:** We thank J.L. King for technical assistance and S. Farmer and the staff of the UAB zebrafish facility for animal care. **Funding:** This work was supported by start-up funds from UAB (to D.A.G.) and by funds from NIH T32GM008361 (to J.P.S.) and T32GM008111 (to S.N.R.). **Author contributions:** S.N.R., J.P.S, H.E.E. and D.A.G. performed experiments and analyzed experimental data. X.C. performed statistical analyses of heart rate data. S.N.R. and D.A.G. conceived the project, D.A.G. supervised the project. All authors contributed to writing the paper and read and approved the final manuscript. **Competing interests:** The authors declare that they have no competing interests.

## References

1. D. Staudt, D. Stainier, Uncovering the Molecular and Cellular Mechanisms of Heart Development Using the Zebrafish. *Annual Review of Genetics* **46**, 397-418 (2012).
2. X. Liu *et al.*, Identification of a membrane estrogen receptor in zebrafish with homology to mammalian GPER and its high expression in early germ cells of the testis. *Biology of reproduction* **80**, 1253-1261 (2009).
3. A. Menuet *et al.*, Molecular characterization of three estrogen receptor forms in zebrafish: binding characteristics, transactivation properties, and tissue distributions. *Biology of reproduction* **66**, 1881-1892 (2002).
4. P. Thomas *et al.*, Conserved estrogen binding and signaling functions of the G protein-coupled estrogen receptor 1 (GPER) in mammals and fish. *Steroids* **75**, 595-602 (2010).
5. D. A. Gorelick, M. E. Halpern, Visualization of Estrogen Receptor Transcriptional Activation in Zebrafish. *Endocrinology* **152**, 2690-2703 (2011).
6. D. A. Gorelick, L. R. Iwanowicz, A. L. Hung, V. S. Blazer, M. E. Halpern, Transgenic zebrafish reveal tissue-specific differences in estrogen signaling in response to environmental water samples. *Environmental health perspectives* **122**, 356-362 (2014).
7. R. Evans, A transcriptional basis for physiology. *Nat Med* **10**, 1022-1026 (2004).

8. C. M. Revankar, D. F. Cimino, L. A. Sklar, J. B. Arterburn, E. R. Prossnitz, A Transmembrane Intracellular Estrogen Receptor Mediates Rapid Cell Signaling. *Science* **307**, 1625-1630 (2005).
9. P. Thomas, Y. Pang, E. J. Filardo, J. Dong, Identity of an estrogen membrane receptor coupled to a G protein in human breast cancer cells. *Endocrinology* **146**, 624-632 (2005).
10. C. E. Navarro *et al.*, Regulation of cyclic adenosine 3',5'-monophosphate signaling and pulsatile neurosecretion by Gi-coupled plasma membrane estrogen receptors in immortalized gonadotropin-releasing hormone neurons. *Mol Endocrinol* **17**, 1792-1804 (2003).
11. Q. Wu *et al.*, Point mutations in the ERalpha Galphai binding domain segregate nonnuclear from nuclear receptor function. *Mol Endocrinol* **27**, 2-11 (2013).
12. P. Kumar *et al.*, Direct interactions with G alpha i and G betagamma mediate nongenomic signaling by estrogen receptor alpha. *Mol Endocrinol* **21**, 1370-1380 (2007).
13. C. S. Watson *et al.*, Estrogen- and xenoestrogen-induced ERK signaling in pituitary tumor cells involves estrogen receptor-alpha interactions with G protein-alpha i and caveolin I. *Steroids* **77**, 424-432 (2012).
14. A. Vivacqua *et al.*, G protein-coupled receptor 30 expression is up-regulated by EGF and TGF alpha in estrogen receptor alpha-positive cancer cells. *Mol Endocrinol* **23**, 1815-1826 (2009).
15. E. R. Levin, G Protein-Coupled Receptor 30: Estrogen Receptor or Collaborator? *Endocrinology* **150**, 1563-1565 (2009).
16. M. Delbeck *et al.*, Impaired left-ventricular cardiac function in male GPR30-deficient mice. *Molecular medicine reports* **4**, 37-40 (2011).
17. U. E. Martensson *et al.*, Deletion of the G protein-coupled receptor 30 impairs glucose tolerance, reduces bone growth, increases blood pressure, and eliminates estradiol-stimulated insulin release in female mice. *Endocrinology* **150**, 687-698 (2009).
18. E. Haas *et al.*, Regulatory role of G protein-coupled estrogen receptor for vascular function and obesity. *Circ Res* **104**, 288-291 (2009).
19. M. R. Meyer *et al.*, G protein-coupled estrogen receptor protects from atherosclerosis. *Sci Rep* **4**, 7564 (2014).
20. T. Takahashi, Juvenile hermaphroditism in the zebrafish, *Brachydanio rerio*. *Bull Fac Fish Hokkaido Univ* **28**, 57-65 (1977).
21. F. S. vom Saal, Variation in phenotype due to random intrauterine positioning of male and female fetuses in rodents. *Journal of reproduction and fertility* **62**, 633-650 (1981).
22. F. S. vom Saal, Sexual differentiation in litter-bearing mammals: influence of sex of adjacent fetuses in utero. *Journal of animal science* **67**, 1824-1840 (1989).
23. J. F. Robertson, ICI 182,780 (Fulvestrant)--the first oestrogen receptor down-regulator--current clinical data. *British journal of cancer* **85 Suppl 2**, 11-14 (2001).
24. M. K. Dennis *et al.*, Identification of a GPER/GPR30 antagonist with improved estrogen receptor counterselectivity. *The Journal of steroid biochemistry and molecular biology* **127**, 358-366 (2011).
25. C. G. Bologna *et al.*, Virtual and biomolecular screening converge on a selective agonist for GPR30. *Nat Chem Biol* **2**, 207-212 (2006).
26. L. E. Jao, S. R. Wenthe, W. Chen, Efficient multiplex biallelic zebrafish genome editing using a CRISPR nuclease system. *Proc Natl Acad Sci U S A* **110**, 13904-13909 (2013).

27. B. S. Jayasinghe, D. C. Volz, Aberrant ligand-induced activation of G protein-coupled estrogen receptor 1 (GPER) results in developmental malformations during vertebrate embryogenesis. *Toxicol Sci* **125**, 262-273 (2012).
28. G. Langer *et al.*, A critical review of fundamental controversies in the field of GPR30 research. *Steroids* **75**, 603-610 (2010).
29. A. Rossi *et al.*, Genetic compensation induced by deleterious mutations but not gene knockdowns. *Nature* **524**, 230-233 (2015).
30. I. Klein, K. Ojamaa, Thyroid hormone and the cardiovascular system. *The New England journal of medicine* **344**, 501-509 (2001).
31. J. Vermot *et al.*, Reversing blood flows act through klf2a to ensure normal valvulogenesis in the developing heart. *PLoS Biol* **7**, e1000246 (2009).
32. K. Node *et al.*, Amelioration of ischemia- and reperfusion-induced myocardial injury by 17beta-estradiol: role of nitric oxide and calcium-activated potassium channels. *Circulation* **96**, 1953-1963 (1997).
33. S. L. Hale, Y. Birnbaum, R. A. Kloner, beta-Estradiol, but not alpha-estradiol, reduced myocardial necrosis in rabbits after ischemia and reperfusion. *American heart journal* **132**, 258-262 (1996).
34. M. A. Sovershaev, E. M. Egorina, T. V. Andreassen, A. K. Jonassen, K. Ytrehus, Preconditioning by 17beta-estradiol in isolated rat heart depends on PI3-K/PKB pathway, PKC, and ROS. *American journal of physiology. Heart and circulatory physiology* **291**, H1554-1562 (2006).
35. M. E. Kabir *et al.*, G Protein-Coupled Estrogen Receptor 1 Mediates Acute Estrogen-Induced Cardioprotection via MEK/ERK/GSK-3 $\beta$  Pathway after Ischemia/Reperfusion. *PLoS ONE* **10**, e0135988 (2015).
36. E. De Luca *et al.*, ZebraBeat: a flexible platform for the analysis of the cardiac rate in zebrafish embryos. *Sci. Rep.*, (2014).
37. E. de Pater *et al.*, Distinct phases of cardiomyocyte differentiation regulate growth of the zebrafish heart. *Development* **136**, 1633-1641 (2009).
38. K. M. Alharthy, F. F. Albaqami, C. Thornton, J. Corrales, K. L. Willett, Mechanistic evaluation of benzo[a]pyrene's developmental toxicities mediated by reduced Cyp19a1b activity. *Toxicol Sci*, (2016).
39. F. Boselli, J. B. Freund, J. Vermot, Blood flow mechanics in cardiovascular development. *Cellular and molecular life sciences : CMLS* **72**, 2545-2559 (2015).
40. D. J. Milan, T. A. Peterson, J. N. Ruskin, R. T. Peterson, C. A. MacRae, Drugs That Induce Repolarization Abnormalities Cause Bradycardia in Zebrafish. *Circulation* **107**, 1355-1358 (2003).
41. T. Schwerte, C. Prem, A. Mair, B. Pelster, Development of the sympatho-vagal balance in the cardiovascular system in zebrafish (*Danio rerio*) characterized by power spectrum and classical signal analysis. *Journal of Experimental Biology* **209**, 1093-1100 (2006).
42. E. M. Waters *et al.*, G-protein-coupled estrogen receptor 1 is anatomically positioned to modulate synaptic plasticity in the mouse hippocampus. *The Journal of neuroscience : the official journal of the Society for Neuroscience* **35**, 2384-2397 (2015).
43. L. Meoli *et al.*, Sex- and age-dependent effects of Gpr30 genetic deletion on the metabolic and cardiovascular profiles of diet-induced obese mice. *Gene* **540**, 210-216 (2014).
44. B. J. Janssen *et al.*, Effects of anesthetics on systemic hemodynamics in mice. *American journal of physiology. Heart and circulatory physiology* **287**, H1618-1624 (2004).

45. C. W. McCollum, N. A. Ducharme, M. Bondesson, J. A. Gustafsson, Developmental toxicity screening in zebrafish. *Birth defects research. Part C, Embryo today : reviews* **93**, 67-114 (2011).
46. M. Westerfield, *The Zebrafish Book. A Guide for the Laboratory Use of Zebrafish (Danio Rerio)*. (University of Oregon Press, Eugene, OR, ed. 4th, 2000).
47. J. A. Gagnon *et al.*, Efficient Mutagenesis by Cas9 Protein-Mediated Oligonucleotide Insertion and Large-Scale Assessment of Single-Guide RNAs. *PLoS One* **9**, e98186 (2014).
48. J. M. Parant, S. A. George, R. Pryor, C. T. Wittwer, H. J. Yost, A rapid and efficient method of genotyping zebrafish mutants. *Dev Dyn* **238**, 3168-3174 (2009).
49. J. S. Waxman, B. R. Keegan, R. W. Roberts, K. D. Poss, D. Yelon, Hoxb5b acts downstream of retinoic acid signaling in the forelimb field to restrict heart field potential in zebrafish. *Dev Cell* **15**, 923-934 (2008).
50. C. Thisse, B. Thisse, High-resolution in situ hybridization to whole-mount zebrafish embryos. *Nature protocols* **3**, 59-69 (2008).
51. G. Lauter, I. Soll, G. Hauptmann, Multicolor fluorescent in situ hybridization to define abutting and overlapping gene expression in the embryonic zebrafish brain. *Neural Dev* **6**, 10 (2011).
52. P. D. Vize, K. E. McCoy, X. Zhou, Multichannel wholemount fluorescent and fluorescent/chromogenic in situ hybridization in *Xenopus* embryos. *Nature protocols* **4**, 975-983 (2009).
53. D. M. Parichy, M. R. Elizondo, M. G. Mills, T. N. Gordon, R. E. Engeszer, Normal table of postembryonic zebrafish development: staging by externally visible anatomy of the living fish. *Dev Dyn* **238**, 2975-3015 (2009).
